1     **Genomic adaptations to an endolithic lifestyle in**  
2             **the coral-associated alga *Ostreobium***

3  
4     Cintia Iha<sup>1,\*</sup>, Katherine E. Dougan<sup>2</sup>, Javier A. Varela<sup>3</sup>, Viridiana Avila<sup>4</sup>, Christopher J. Jackson<sup>1</sup>,  
5     Kenny A. Bogaert<sup>5</sup>, Yibi Chen<sup>2</sup>, Louise M. Judd<sup>6</sup>, Ryan Wick<sup>6</sup>, Kathryn E. Holt<sup>6,7</sup>, Marisa M.  
6     Pasella<sup>1</sup>, Francesco Ricci<sup>1</sup>, Sonja I. Repetti<sup>1</sup>, Mónica Medina<sup>4</sup>, Vanessa R. Marcelino<sup>8</sup>, Cheong  
7     Xin Chan<sup>2</sup>, Heroen Verbruggen<sup>1,9</sup>

8  
9     <sup>1</sup>School of BioSciences, University of Melbourne, Victoria 3010, Australia

10    <sup>2</sup>School of Chemistry and Molecular Biosciences and Australian Centre for Ecogenomics, The  
11    University of Queensland, Brisbane, Queensland 4072, Australia

12    <sup>3</sup>School of Microbiology/Centre for Synthetic Biology and Biotechnology/Environmental  
13    Research Institute/APC Microbiome Institute, University College Cork, Cork T12 YN60,  
14    Ireland

15    <sup>4</sup>Pennsylvania State University, University Park, PA, 16802, USA

16    <sup>5</sup>Phycology Research Group, Ghent University, Krijgslaan 281 S8, 9000 Gent, Belgium

17    <sup>6</sup>Department of Infectious Diseases, Central Clinical School, Monash University, Melbourne,  
18    3004, Australia

19    <sup>7</sup>London School of Hygiene & Tropical Medicine, London, WC1E 7HT, UK

20    <sup>8</sup>Centre for Innate Immunity and Infectious Diseases, Hudson Institute of Medical Research,  
21    Clayton 3168, Victoria, Australia

22    <sup>9</sup>Lead Contact: [heroen@unimelb.edu.au](mailto:heroen@unimelb.edu.au)

23  
24    \*Correspondence: [cintiaiha@gmail.com](mailto:cintiaiha@gmail.com)

25

26

## 27 **Summary**

28 The green alga *Ostreobium* is an important coral holobiont member, playing key roles in  
29 skeletal decalcification and providing photosynthate to bleached corals that have lost their  
30 dinoflagellate endosymbionts. *Ostreobium* lives in the coral's skeleton, a low-light environment  
31 with variable pH and O<sub>2</sub> availability. We present the *Ostreobium* nuclear genome and a  
32 metatranscriptomic analysis of healthy and bleached corals to improve our understanding of  
33 *Ostreobium*'s adaptations to its extreme environment and its roles as a coral holobiont member.  
34 The *Ostreobium* genome has 10,663 predicted protein-coding genes and shows adaptations for  
35 life in low and variable light conditions and other stressors in the endolithic environment. This  
36 alga presents a rich repertoire of light-harvesting complex proteins but lacks many genes for  
37 photoprotection and photoreceptors. It also has a large arsenal of genes for oxidative stress  
38 response. An expansion of extracellular peptidases suggests that *Ostreobium* may supplement  
39 its energy needs by feeding on the organic skeletal matrix, and a diverse set of fermentation  
40 pathways allow it to live in the anoxic skeleton at night. *Ostreobium* depends on other holobiont  
41 members for vitamin B12, and our metatranscriptomes identify potential bacterial sources.  
42 Metatranscriptomes showed *Ostreobium* becoming a dominant agent of photosynthesis in  
43 bleached corals and provided evidence for variable responses among coral samples and different  
44 *Ostreobium* genotypes. Our work provides a comprehensive understanding of the adaptations of  
45 *Ostreobium* to its extreme environment and an important genomic resource to improve our  
46 comprehension of coral holobiont resilience, bleaching and recovery.

## 47 **Keywords**

48 Coral holobiont, Green algae, Low-light adaptation, Nuclear genome, *Ostreobium*

## 49 **Introduction**

50 Coral health depends on the harmonious association between the coral animal and its  
51 microbial associates, together known as the holobiont. A wealth of studies shows that climate  
52 change threatens coral health by disrupting the association between the coral and its  
53 photosynthetic dinoflagellate endosymbionts (Symbiodiniaceae), culminating in coral bleaching  
54 and death. The role of other microbes in coral resilience is just starting to be understood, and  
55 our current knowledge is largely based on correlations between coral health status and the  
56 presence of microbial taxa inferred from metabarcoding. Whole-genome sequences of corals  
57 and their symbionts are an invaluable resource to obtain a mechanistic understanding of the  
58 functioning and resilience of the holobiont. Recent genomic studies have shown that the coral  
59 host, dinoflagellate symbionts, and prokaryotes living in the coral tissue have complementary  
60 pathways for nutrient exchange, highlighting the interdependence and possible co-evolution  
61 between these members of the coral holobiont [1, 2]. To date, most work has focused on the  
62 coral animal and microbiota associated with its living tissue, with very little work done on the  
63 highly biodiverse and functionally important microbiota inhabiting the skeleton of the coral [3,  
64 4].

65 The green alga *Ostreobium* sp. is an important eukaryotic symbiont living inside the coral  
66 skeleton (Figure 1A) [4, 5]. This endolithic alga is the principal agent of coral reef bioerosion,  
67 burrowing through the limestone skeleton of corals and other reef structures and dissolving up  
68 to a kilogram of reef CaCO<sub>3</sub> per m<sup>2</sup> per year [6]. These algae bloom in the skeleton when corals  
69 bleach (Figure 1B) [7, 8], boosted by the extra light, and – hypothetically – the extra nitrogen  
70 and CO<sub>2</sub> that may reach the skeleton in the absence of Symbiodiniaceae. Part of the  
71 carbohydrates produced by *Ostreobium* photosynthesis makes their way into the coral tissue,  
72 extending the time it can survive without its dinoflagellate partner [9, 10]. While these  
73 ecological and physiological phenomena have been described, our knowledge of the molecular  
74 mechanisms involved is scarce, severely limiting our understanding of key processes in healthy  
75 and bleached holobionts. The question remains as to not only what is the mechanism of this

76 skeletal deterioration, but how tightly *Ostreobium* metabolism integrates with that of the coral  
77 and associated microbiota. Developing this knowledge will be essential to understand and  
78 manage the roles that skeletal microbiota play during coral bleaching.

79 *Ostreobium* has an extreme lifestyle for a green alga [11]. It lives in a very dimly lit  
80 environment, with mostly the low-energy, far-red wavelengths not used up by Symbiodiniaceae  
81 available [12]. The action spectrum of *Ostreobium* photosynthesis extends into far-red  
82 wavelengths, but the underlying molecular mechanisms are little known [13, 14]. The daily  
83 rhythm of oxygenic photosynthesis and respiration within the skeletal matrix leads to strong  
84 fluctuations of pH and O<sub>2</sub>, ranging from total anoxia at night to ca. 60% of air saturation during  
85 the day [11, 15], and the skeleton limits diffusion of O<sub>2</sub> and other compounds. Free-living algae  
86 do not normally encounter these stressful conditions, and the mechanisms allowing *Ostreobium*  
87 to thrive in this extreme habitat are virtually unknown.

88 From an evolutionary perspective, *Ostreobium* is a member of the green plant lineage  
89 (Viridiplantae), which includes the land plants that originated in the Streptophyta lineage and a  
90 broad diversity of algae in the Chlorophyta lineage [16] (Figure 1C). *Ostreobium* is in  
91 Bryopsidales, an order of marine algae that has evolved in the Chlorophyta. While *Ostreobium*  
92 forms microscopic filaments, many representatives of this order are larger seaweeds [17].

93 So far, the genomic resources available for coral holobiont research have been limited to  
94 the coral animal, its dinoflagellate photosymbionts, and a small fraction of the prokaryotes  
95 associated with its tissue (e.g. [1] [2] [18] [19] [20]). Here, we present the first nuclear genome  
96 of an *Ostreobium* species to extend the available genomic toolkit into the coral skeleton, an  
97 element of the holobiont crucial for our comprehension of coral resilience, bleaching, and  
98 recovery. We expect that these genomic resources will spur new insights into processes of coral  
99 bleaching encompassing the entire holobiont, as this knowledge will be essential to safeguard  
100 the future of coral reefs in a changing climate. Based on comparative analyses of the  
101 *Ostreobium* genome with those of other green algae, we show *Ostreobium*'s innovations in  
102 light-harvesting antennae and derive insights and hypotheses about its functions as a coral  
103 symbiont, and as an alga living in an extreme environment.

## 104 **Results and Discussion**

105 We obtained a draft nuclear genome of *Ostreobium quekettii* (SAG culture collection strain  
106 6.99, non-axenic) by assembling sequence reads from Illumina and Nanopore platforms (Data  
107 S1). We assembled the final haploid nuclear genome in 2,857 scaffolds (total 146.26 MB of  
108 assembled bases; N50 length 73.43 KB), with an average sequence coverage of 99.72x for  
109 short-read data and 25.2x for long-read data. The genome is diploid with ~1.29%  
110 heterozygosity. The GC content is 52.4%, which is higher than 40.4% of *Caulerpa lentillifera*  
111 (the closest relative of *Ostreobium* for which a nuclear genome has been sequenced), but less  
112 than most other green algae (Data S1). Gene annotation of the haploid representation of the  
113 genome resulted in 10,663 predicted protein-coding genes, of which RNA sequencing data  
114 supported ~52%. We recovered 60.7% of the complete core conserved BUSCO eukaryote  
115 genes, which is similar to *C.lentillifera* (59.2%) and *Ulva mutabilis* (65.8%) (Data S1).

## 116 **Photobiology in a dark place**

117 Our work shows that *Ostreobium* has more light-harvesting complex (LHC) proteins than  
118 most green algae and *Arabidopsis thaliana* (Figure 2A, Figure S1). This expansion of the LHC  
119 protein arsenal is found in both photosystems, with duplications of the *Lhca1* and *Lhca6* gene  
120 families associated with PSI (Figure S1A) and the presence of both *Lhcp* and *Lhcb* families  
121 associated with PSII (Figure S1B).

122 Most green algae possess a single *Lhca1* gene, while *Ostreobium* has two *Lhca1* (Figure  
123 2). The amino acid residue binding chlorophyll in LHC proteins is essential in determining the  
124 chromophore organisation, which affects light spectral absorption [21]. The *Lhca1* protein  
125 typically uses histidine as the chlorophyll-binding residue (A5 site in Figure 2B), but the  
126 siphonous green algae (*Ostreobium*, *C. lentillifera* and *Bryopsis corticulans*) all have asparagine  
127 (Figure 2B). *Arabidopsis thaliana* mutants with asparagine at the A5 site were shown to have  
128 red-shifted absorption spectra [21, 22], suggesting that siphonous green algae may also use this  
129 mechanism to access far-red wavelengths for photosynthesis. The *Lhca6* protein, located in the

130 outer LHC belt, forms heterodimers with Lhca5, and their long C-terminal loops facilitate  
131 interactions between the inner and outer LHC belts [23, 24]. While most microalgae have a  
132 single *Lhca6* copy (and none in the seaweeds *C. lentillifera* and *U. mutabilis*), *Ostreobium*  
133 contains three copies (Figure S1A), supported by different chromosomal contexts and their  
134 presence in our transcriptome.

135 In the PSII-associated LHC, *Ostreobium* possesses an unusual combination of both the  
136 Lhcp and major light-harvesting complex (Lhcb) protein families (Figure 2A and Figure S1B).  
137 Lhcb is found in most species of the green lineage except prasinophytes that use the Lhcp  
138 family instead [25]. Only the streptophyte *Mesostigma viridis* is known to encode proteins of  
139 both families (Figure S1B), suggesting that Lhcp and Lhcb were both part of the LHCI antenna  
140 system of the green plant ancestor and the families were differentially lost in different green  
141 algal and land plant lineages [26, 27].

142 Although *Ostreobium* shows a high diversity of LHC genes, it lacks many genes for  
143 photoprotection and photoreceptors. The non-photochemical quenching (NPQ) genes for  
144 LHCSR and PsbS are both absent from *Ostreobium* and *C. lentillifera* genomes (Figure S1B).  
145 Energy-dependent quenching (qE) was not observed in most siphonous green algae [28], and  
146 our genomic data lack crucial genes for this process. *Ostreobium* also lacks all the light-  
147 harvesting complex-like (LIL) genes coding for OHP1, OHP2, LIL3, ELIP, and four-helix  
148 proteins. While the function of LIL proteins has not been comprehensively determined, their  
149 involvement in response to light stress is known [29]. The loss of genes involved in high-light  
150 sensitivity also extends to the chloroplast genome of *Ostreobium*, which lacks the chloroplast  
151 envelope membrane protein gene (*cemA*) that is needed in *Chlamydomonas* to persist in high-  
152 light conditions [30].

153 *Ostreobium* has fewer known photoreceptors than do most other green algae. We  
154 identified three blue light photoreceptors: a phototropin (not shown), a plant cryptochrome, and  
155 a photolyase/blue-light receptor (PHR1; Figure S2). Given the predominance of far-red light in  
156 coral skeletons, one might expect the red/far-red phytochromes to be present in *Ostreobium*, but  
157 this was not the case. Although phytochromes are widely found in the green plant lineage, they

158 have been lost in most of the green algal lineage Chlorophyta [31, 32]. Most green algae appear  
159 to have no specific photoreceptors for red light [33], but the animal-like cryptochrome in  
160 *Chlamydomonas* can be activated by red light [34]. This protein's functions include the  
161 transcription of genes involved in photosynthesis, pigment biosynthesis, cell cycle control and  
162 circadian clock [35]. This gene is not found in *Ostreobium*, which also lacks the Cry-DASH-  
163 type cryptochromes observed in many other green algae (Figure S2). *Ostreobium* does have two  
164 genes similar to the *Arabidopsis* putative blue-light receptor protein called PAS/LOV (Uniprot  
165 O64511) [36]. *Ostreobium* also lacks the rhodopsin-like photoreceptors.

166 Besides the photoprotective LHC genes and photoreceptors, *Ostreobium* and *C.*  
167 *lentillifera* appear to have lost the light-dependent protochlorophyllide oxidoreductase (LPOR),  
168 another important light signalling gene involved in chlorophyll biosynthesis. The reduction of  
169 protochlorophyllide to chlorophyllide can be catalysed by either of two non-homologous  
170 enzymes: the nuclear encoded LPOR and the plastid-encoded light-independent (DPOR)  
171 protochlorophyllide oxidoreductase [37]. Most green algae have both systems, and DPOR has  
172 been lost in many eukaryotes [38]. The *Ostreobium* genome provides the first evidence for the  
173 loss of LPOR in any eukaryote, and a screening of *C. lentillifera* also came back negative,  
174 suggesting that the loss may have occurred in the common ancestor of Bryopsidales. Both  
175 genera encode DPOR in their chloroplast genomes [30, 39]. Although both enzymes catalyse  
176 the same reaction, they have different features: DPOR is encoded, synthesised and active in the  
177 plastid, and is highly sensitive to oxygen [40], while the nucleus-encoded LPOR is synthesised  
178 in the cytosol and active in the plastid, and requires light to be activated [41]. DPOR might be  
179 an advantage over LPOR for endolithic photosynthetic organisms because of the low-light, low-  
180 oxygen environments they inhabit [4].

181 The *Ostreobium* genome clearly reflects its evolutionary trajectory into a peculiar light  
182 habitat, with an unparalleled arsenal of LHC proteins but few known mechanisms to sense the  
183 light or protect itself against excessive light. Some of these genome features are shared with  
184 other Bryopsidales, including the loss of LPOR and qE-type non-photochemical quenching.  
185 This suggests that the common ancestor of Bryopsidales may have been a low-light-adapted

186 organism, possibly an endolithic alga like *Ostreobium* is now, a hypothesis supported by  
187 *Ostreobium* being the sister lineage of all other Bryopsidales [42] and other bryopsidalean  
188 lineages also containing old, largely endolithic families [43]. Bryopsidales originated in the  
189 Neoproterozoic with *Ostreobium* diverging in the early Paleozoic [17, 44]. One could speculate  
190 that the bryopsidalean ancestor inhabited a low-light environment, possibly on the dimly lit  
191 seafloor beneath Cryogenian ice sheets. The different lineages emerging from this ancestor  
192 could then have followed different evolutionary trajectories during the onset of Paleozoic  
193 grazing, with the *Ostreobium* lineage fully committing to an endolithic lifestyle while other  
194 bryopsidalean lineages engaged in an evolutionary arms race with grazers to form larger and  
195 chemically defended macroalgae.

196       The unusually large arsenal of LHC proteins appears to be confined to the *Ostreobium*  
197 lineage. The genus is present in a diverse range of light environments, from old oyster shells in  
198 the intertidal, where it experiences full-spectrum sunlight, to the coral skeleton (far-red  
199 enriched) and in mesophotic habitats (blue light), hinting at its capability to harvest energy from  
200 photons of many different wavelengths [45]. While from the genome data alone, we cannot  
201 derive that the different LHC proteins convey a capability for photosynthesis at different  
202 wavelengths, it is known that different molecular arrangements of LHC proteins and the specific  
203 pigments binding to them have an impact on their spectral properties [46], which could help  
204 *Ostreobium* acclimate to different light environments.

## 205 **Life in an extreme environment**

206       The endolithic environment, and the coral skeleton, is an extreme environment in many  
207 ways. Oxygen levels vary strongly, from high concentrations caused by photosynthesis during  
208 the day to complete anoxia due to respiration during the night, and this trend is mirrored in  
209 strong diurnal pH fluctuations [4, 15]. Reactive oxygen species (ROS) can be produced in high  
210 quantities in these conditions, particularly in the morning when photosynthesis starts [47].

211       The *Ostreobium* genome exhibits a strong genetic capacity for oxidative stress response,  
212 with ROS scavenging and neutralising genes present in large numbers compared to other green



213 algae (Figure 3). We found five copies of catalase (CAT), the enzyme that processes hydrogen  
214 peroxide. Most other green algae have one or two (Figure 3), or none in the case of  
215 prasinophytes (Figure S3). Four of the *Ostreobium* catalases formed a unique lineage in our  
216 phylogenetic analysis (Figure S3), and three of them are found in tandem in the same scaffold,  
217 indicating diversification of this gene in the *Ostreobium* lineage. Hydrogen peroxide can also be  
218 processed through the glutathione-ascorbate cycle, a metabolic pathway neutralising hydrogen  
219 peroxide through successive oxidations and reductions of ascorbate, glutathione, and NADPH  
220 [48] (Figure 3). *Ostreobium* featured high copy numbers of the enzymes to quickly purify  
221 ascorbate, with five copies of ascorbate peroxidase (APX) and four monodehydroascorbate  
222 reductases (MDHAR) (Figure S3). The glutathione-ascorbate cycle is important to keep  
223 ascorbate free for H<sub>2</sub>O<sub>2</sub> scavenging (Figure 3).

224 Most algae live in environments with higher oxygen concentrations and can produce  
225 energy via the respiratory electron transport chain. In the coral skeleton, however, any oxygen  
226 produced through photosynthesis is completely consumed by respiration within an hour of the  
227 onset of darkness [15], and the environment is anoxic for long periods. *Ostreobium* does have a  
228 variety of options for fermentative metabolism (Figure S4), including expanded copy numbers  
229 for LDH, ALDH and MDH (Data S1), implying that acetate, succinate and lactate may be the  
230 preferred fermentation products in *Ostreobium*.

231 A comparison of the number of genes having particular InterPro annotations between  
232 *Ostreobium* and *Caulerpa* showed a large number of depleted IPR terms in *Ostreobium*, which  
233 can be attributed to an enrichment in the *Caulerpa* genome, as counts in *Ostreobium* are  
234 comparable to those of other green algae. However, peptidases were strongly enriched in  
235 *Ostreobium* (e.g. Peptidase S1, PA clan – 189 genes; Serine-proteases trypsin domain – 159  
236 genes; Figure S5). About 40% of the genes are predicted to be secreted (signal peptide), and  
237 25% membrane-bound, compared to 31% and 12% (of total 57 genes) respectively in *C.*  
238 *lentillifera*, suggesting an expanded potential for external protein degradation in *Ostreobium*. It  
239 is known that *Ostreobium* can penetrate the organic-inorganic composite material of the black  
240 pearl oyster nacreous layer [49], and the combination of proteolytic enzyme proliferation and its

241 growth at excessively low light intensities lends support to the hypothesis that this alga could  
242 complement its energy needs by feeding on the organic matrix of the coral skeleton and shells.

## 243 **The coral holobiont**

244 *Ostreobium* plays a number of important roles in the coral holobiont, particularly during  
245 periods of coral bleaching [4], but current knowledge is far from complete, and the genome can  
246 help define hypotheses of how the species may interact with other holobiont members.

### 247 *Molecular mechanism of CaCO<sub>3</sub> dissolution*

248 *Ostreobium* and endolithic fungi play important roles as microbial bioerosion agents in  
249 the coral skeleton [50]. While the molecular mechanisms behind this phenomenon in eukaryotes  
250 are not yet known [51], the genome allows us to make conjectures about how bioerosion by  
251 *Ostreobium* might occur (Figure 4A). A working model for microbial carbonate excavation was  
252 first described for cyanobacteria, involving passive uptake of Ca<sup>2+</sup> at the boring front,  
253 decreasing the ion concentration in the extracellular area below calcite saturation levels and  
254 leading to the dissolution of adjacent calcium carbonate [52]. Imported Ca<sup>2+</sup> is transported along  
255 the cyanobacterial filament and excreted away from the growing tip, likely by P-type Ca<sup>2+</sup>-  
256 ATPases that pair transport of Ca<sup>2+</sup> with counter transport of protons [52].

257 *Ostreobium* has an expanded repertoire (34 genes) of calcium transporters (Data S1),  
258 including 19 voltage-dependent calcium channels and several transient receptor potential  
259 transporters, two-pore channels and calcium-transporting ATPases. Calcium uptake, possibly  
260 combined with acidification via a Ca<sup>2+</sup>/H<sup>+</sup> transporter, would promote decalcification (Figure  
261 4A), allowing *Ostreobium* to burrow into the coral skeleton. Calcium toxicity can be avoided  
262 either by accumulation in a vacuole and/or posterior transport out of the cell. In addition to  
263 calcium transport, bicarbonate uptake could also play a role in the burrowing mechanism.  
264 *Ostreobium* carries two orthologs of the CIA8 transporter responsible for bicarbonate transport  
265 in *C. reinhardtii* [53], and the imported bicarbonate may be further transported into the  
266 chloroplast to be fixed. *Ostreobium* has a carbonic anhydrase predicted to be targeted outside

267 the cell that may further assist the decalcification process. In natural communities dominated by  
268 *Ostreobium*, CaCO<sub>3</sub> dissolution was higher at night, suggesting that *Ostreobium* takes  
269 advantage of the lower external pH at night [51].

270 Even though the *Ostreobium* genome does not suggest a specific mechanism, it lends  
271 support to the notion that its bioerosion likely bears similarities to the process in cyanobacteria.  
272 A detailed characterisation of this process should be a priority, as *Ostreobium* is responsible for  
273 ca. 30-90% of microbial dissolution of skeletal CaCO<sub>3</sub>. Higher temperatures and lower pH boost  
274 this activity, suggesting that this yet unknown process will lead to major reef deterioration in  
275 future ocean conditions [51].

#### 276 *Interactions with other holobiont members*

277 As far as holobiont functioning goes, interactions between the coral animal and its algal  
278 and bacterial symbionts are best understood, and interactions between the Symbiodiniaceae and  
279 bacteria are just starting to come into focus [54], but little is known about interactions involving  
280 *Ostreobium*. It is well known that several algae are auxotrophic for certain nutrients, e.g.  
281 vitamin B12 (cobalamin), a cofactor involved in the synthesis of methionine that many algae  
282 obtain from associated bacteria [55]. The *Ostreobium* genome shows that the metabolic  
283 pathways involved in the production of vitamins B1, B2, B6 and B9 are complete, but it is  
284 auxotrophic for vitamin B12 (cobalamin). The *Ostreobium* genome encodes a B12-independent  
285 methionine synthase (METE) in addition to the B12-dependent version (METH, [56]), so while  
286 the alga most likely does not strictly require B12 for growth, the presence of METH suggests  
287 that it uses B12 provided by other holobiont members. Corals are also auxotrophic for several  
288 vitamins and amino acids that are produced by holobiont members [2] (Figure 4B).

289 The nature of metabolic exchanges between *Ostreobium* and the coral animal is an open  
290 question in holobiont research, and a potentially critical one, as coral bleaching and subsequent  
291 blooming of the endolithic *Ostreobium* algae become increasingly common due to ocean  
292 warming. Typical algal-animal metabolic exchanges include nitrogen and CO<sub>2</sub> provision by the  
293 animal to the alga and carbohydrate provision to the animal by the alga [57, 58]. Coral polyps

294 are known to secrete nitrogen in the form of ammonia. An expanded repertoire of ammonia  
295 transporters was identified in *Ostreobium* (Data S1), potentially reflecting an adaptation to  
296 increase and diversify ammonia uptake in the alga. This observation is also in line with the  
297 presence of diazotrophic bacteria facilitating the conversion of N<sub>2</sub> into ammonia in marine  
298 limestones (including coral skeletons) and ammonia being the most abundant form of inorganic  
299 nitrogen in skeletal pore waters [59]. It adds to the evidence for the roles that endolithic  
300 organisms play in the holobiont N cycle. During carbon cycling in the holobiont, glucose has  
301 been postulated as one of the main carbohydrates exchanged between Symbiodiniaceae and  
302 corals [57]. While carbon compounds fixed by endoliths are known to be transferred to the coral  
303 animal and subsequently assimilated, neither the exact transferred molecules nor the molecular  
304 mechanisms involved in their translocation have been characterised, but the *Ostreobium*  
305 genome encodes four genes coding for H<sup>+</sup>-glucose transporters that might be involved in this  
306 process (Data S1).

### 307 *Probing changes in holobiont processes*

308 While these investigations of the *Ostreobium* genome allowed us to evaluate hypotheses  
309 about interactions within the holobiont, gaining more in-depth insight will require approaches  
310 that study multiple partners simultaneously. As a first step towards understanding the molecular  
311 mechanisms in the coral holobiont during coral bleaching, we screened transcriptomes of  
312 healthy and bleached coral holobionts. We exposed fragments of the coral *Orbicella faveolata*  
313 to elevated temperatures leading to bleaching, followed by re-acclimation of the bleached  
314 samples to ambient temperatures (post-bleaching condition), during which the corals remained  
315 bleached, and an *Ostreobium* bloom occurred. Total metatranscriptomes (including coral tissue  
316 and skeleton) were generated for healthy control samples that were kept under ambient  
317 temperature (no bleaching), and the bleached samples.

318 Taxonomic profiles of the reads and assembled transcripts are provided in Data S1. While  
319 the metatranscriptome sequencing depth was not designed to track up-and down-regulation of  
320 individual genes, it was clear that expression of the photosynthesis genes *psbA* and *rbcL* from

321 Symbiodiniaceae was drastically lower in bleached samples while expression of these genes in  
322 *Ostreobium* increased (Figure 5A), supporting the notion that *Ostreobium* becomes a dominant  
323 agent of photosynthesis in the bleached holobiont. The bleached state increases the light  
324 available to *Ostreobium*, which likely leads to the need for higher repair rates of PSII protein D1  
325 (encoded by *psbA*) and higher rates of carbon fixation (facilitated by RuBisCO, encoded by  
326 *rbcL*). The expression of these genes by Symbiodiniaceae in the bleached samples, albeit at low  
327 levels, suggests that some of these endosymbionts have remained or that some re-colonisation  
328 has occurred during the post-bleaching period.

329         We detected multiple haplotypes of *psbA* (Figure 5B), indicating that several strains of  
330 *Ostreobium* were present in the *O. faveolata* skeletons [60]. While expression levels for these  
331 haplotypes tended to increase, some did not change significantly while others differed by an  
332 order of magnitude or more. These differences suggest that *Ostreobium* strains may differ  
333 physiologically or change in relative abundance during the experiment. Such differences in the  
334 microbiome – whether *Ostreobium* strains or other holobiont members – may result in high  
335 variability among coral samples in experimental work. Indeed, we found considerable  
336 differences in expression levels between samples within conditions, suggesting that future  
337 metatranscriptome experiments should be planned to use generous replication. The  
338 metatranscriptomes also provide some hints as to where *Ostreobium* may source its needs for  
339 vitamin B12 (cobalamin). We detected 29 bacterial transcripts from the vitamin B12 pathway,  
340 including several Proteobacteria, Bacteroidetes, and Cyanobacteria that are known to be  
341 abundant in the coral skeleton (Data S1) [43]. These results contribute to defining potential  
342 mutualistic relationships between bacteria and *Ostreobium* in the holobiont (Figure 4B).

## 343 **Conclusion**

344         The complexity of the coral holobiont presents an interesting challenge to reconstruct a  
345 comprehensive model of metabolic exchanges and other interactions among its component  
346 organisms. Recent progress in building such models from genomes of coral and tissue-

347 associated prokaryotes [2] has not been mirrored in the skeleton. Our results allowed us to  
348 refine hypotheses from previous physiological work, illuminating the biology of a keystone  
349 eukaryotic phototroph in this environment. Our work clearly shows genomic adaptations of  
350 *Ostreobium* to the low light and variable oxygen conditions it experiences in endolithic  
351 environments, with an unparalleled arsenal of light-harvesting complexes and expansions in  
352 pathways for fermentation and reactive oxygen processing. Despite this progress, many  
353 questions remain about the mechanisms involved in this alga's interaction with the holobiont,  
354 their immediate physiological effects on the partners and longer-term ecological consequences.  
355 One challenge in this area of research is that the roles and impacts of *Ostreobium* vary in time,  
356 with a relatively minor contribution to holobiont photosynthesis in healthy corals [10].  
357 However, our results are showing that *Ostreobium* blooms during bleaching cause a shift of  
358 expression levels between microbiome members, with *Ostreobium* becoming the dominant  
359 oxygenic phototroph. These changes likely have implications flowing through the entire  
360 microbiome interaction network, but our knowledge of this is in its infancy. Important questions  
361 remain as to what extent the *Ostreobium* bloom leads to a beneficial metabolite exchange with  
362 the coral host, and how the fitness costs/benefits of *Ostreobium* add up across the entire coral  
363 life cycle. The fact that there are >80 different species-level operational taxonomic units in  
364 *Ostreobium* complicates the matter further [43, 60]. Genome-scale data from *Ostreobium* and  
365 other interacting partners critically link these physiological features to underlying molecular  
366 mechanisms. The results and datasets generated in this study provide a foundational reference  
367 for future research into the biology of this key holobiont member, and the intricate role that  
368 *Ostreobium* plays in coral biology. This will be of particular importance in the light of global  
369 climate change, as the increased frequency of bleaching and lower pH will boost *Ostreobium*  
370 populations and carbonate dissolution rates.

## 371 **Acknowledgements**

372 Funding was provided by the Australian Research Council (FT110100585 to H.V.,  
373 DP150100705 to H.V. and C.X.C., DP190102474 to C.X.C., DP200101613 to H.V. and M.M.),  
374 the University of Melbourne (CBRI to H.V. & K.E.H.), the DoE Joint Genome Institute (CSP  
375 grant 1622 to M.M. and V.A.M.) and the National Science Foundation (OCE 1442206 and IOS  
376 0644438 to M.M.), Pennsylvania State University (to M.M.), the Canon Foundation (to M.M.)  
377 and CONACyT (216837 to V.A.M.). This work is supported by the computational resources of  
378 the National Computational Infrastructure (NCI) National Facility systems through the NCI  
379 Merit Allocation Scheme (Project d85) awarded to C.X.C., and through the Nectar Research  
380 Cloud. We thank R. Iglesias-Prieto, C.T. Galindo and M. Weber for assisting with field  
381 experiments and J. Beardall, J.C. Lagarias and A.H. Knoll for discussions. We thank A. Fordyce  
382 for the bleached coral photograph.

## 383 **Author contribution**

384 C.I., K.E.D., C.J.J., V.A., V.R.M., M.M., C.X.C., H.V. designed research; C.I., K.E.D., V.A.,  
385 C.J.J., Y.C., L.M.J. performed research; K.E.H., H.V. contributed new reagents/analytic tools;  
386 C.I., K.E.D., J.A.V., V.A., C.J.J., K.A.B., Y.C., R.W., V.R.M., C.X.C., H.V. analysed data; C.I.,  
387 K.E.D., J.A.V., V.A., K.A.B., Y.C., M.M.P., F.R., S.I.R., M.M., V.R.M., C.X.C., H.V. wrote  
388 the paper.

## 389 **Declaration of Interests**

390 The authors declare no competing interests.

## 391 **Figure Legends**

392 **Figure 1. Localisation of *Ostreobium* in the coral skeleton and phylogenetic position.**

393 (A) Cross-section of *Paragoniastrea australensis* coral showing *Ostreobium* that inhabits the  
394 skeleton. The inset shows *Ostreobium* filaments after skeletal decalcification.  
395 (B) Bleached coral with evident *Ostreobium* bloom (indicated by white arrows). Photograph by  
396 Alexander Fordyce.  
397 (C) Phylogenetic tree of Viridiplantae (Streptophyta + Chlorophyta) showing the position of  
398 *Ostreobium quekettii*.

399

400 **Figure 2. Diversity of light-harvesting complex proteins in *Ostreobium* and some other**  
401 **species.**

402 (A) Number of different light-harvesting complex (LHC) proteins in *Ostreobium*, other green  
403 algae and *Arabidopsis thaliana*. For a comparative analysis, we included the species models for  
404 plants and green algae, *Arabidopsis thaliana* and *Chlamydomonas reinhardtii*, respectively;  
405 *Ostreococcus tauri*, because it presents a special type of LHC protein that are found mainly in  
406 Prasinophytes (Lhcp) and were previously well characterised [25]; and *Ulva mutabilis* and  
407 *Caulerpa lentillifera* because they are ulvophycean relatives of *Ostreobium*.

408 (B) Amino acid sequence comparison between Lhca1 proteins, showing asparagine (N) at the  
409 chlorophyll-binding residue A5 in *Ostreobium*.

410 See also Figure S1.

411

412 **Figure 3. Simplified oxidative response pathway comparing the number of genes for**  
413 **enzymes found in the genomes from *Ostreobium* and some other green algae.**

414 Compared with *C. lentillifera*, *U. mutabilis* and *C. reinhardtii*, *Ostreobium* does have more  
415 copies of genes related to quick response to neutralise ROS, such as catalase (CAT) and  
416 monodehydroascorbate reductase (MDHAR). SOD, superoxide dismutase; APX, ascorbate  
417 peroxidase; DHAR, dehydroascorbate reductase; GR, glutathione reductase.

418 See also Figure S3.

419

420 **Figure 4. Roles of *Ostreobium* in the coral holobiont.**



421 (A) Potential mechanisms available to *Ostreobium* for excavation of the CaCO<sub>3</sub> skeleton of  
422 corals near the growing tip of *Ostreobium* filament.

423 (B) Possible interactions between members of the holobiont derived from genome sequence  
424 data.

425

#### 426 **Figure 5. Individual gene expression in the metatranscriptome analysis.**

427 (A) Comparison of *rbcL* and *psbA* gene expression between *Ostreobium* combined transcripts  
428 (haplotypes) and Symbiodiniaceae transcripts in control and post-bleached treatments.

429 (B) Expression between control and post-bleached treatments of individual *psbA*  
430 haplotypes found in *Ostreobium* transcriptomes, indicating several strains in *O. faveolata*  
431 skeletons.

## 432 **Methods**

### 433 **Culturing and nucleic acid extraction**

434 *Ostreobium quekettii* (SAG culture collection strain 6.99, non-axenic) was cultured in F/2  
435 media on a 14h/8h light/dark cycle at ~19°C. This strain was discovered growing on a culture of  
436 a small tropical marine red macroalga (*Acrothamnion preissii*) and isolated into culture. The  
437 strain is nested in a lineage of *Ostreobium* species found in scleractinian corals [61] and it  
438 readily colonises coral skeleton when it is provided as a substrate. This clearly shows that the  
439 strain is an appropriate representative for this limestone-burrowing coral-associated genus,  
440 despite it being initially isolated from a non-coral source. *Ostreobium* is known to produce  
441 flagellated spores and we think that a spore residing on the surface of the red alga is the most  
442 likely source of the strain. Total DNA was extracted using a modified cetyl trimethylammonium  
443 bromide (CTAB) method [62].

## 444 **Genome sequencing**

445 We conducted three short-read sequencing runs using Illumina sequencing technology  
446 (Data S1) with 150 bp paired-end reads, for ~40 Gb data in total. For the first sequencing run,  
447 the total DNA was sheared to ~500 bp size fragments and processed using KAPA LTP Library  
448 Preparation Kit (Roche Sequencing Solutions, Pleasanton, California, USA) to prepare the DNA  
449 library, which was sequenced on the Illumina NextSeq 500 using PE 150 bp High Output Kit  
450 (Illumina, San Diego, California, USA), at Georgia Genomics and Bioinformatics Core  
451 (University of Georgia, USA). For the other two sequencing runs, the total DNA was sheared to  
452 ~350 bp fragments and the libraries were generated using TruSeq Nano DNA HT Sample  
453 preparation Kit (Illumina) following the manufacturer's instructions. These DNA libraries were  
454 clustered on a cBot Cluster Generation System using HiSeq X HD PE Cluster Kit (Illumina) and  
455 sequenced on an Illumina HiSeq X Ten platform at Novogene, Beijing.

456 For long-reads Nanopore MinION sequencing (Oxford Nanopore Technologies), we used  
457 the Ligation Sequencing Kit 1D (SQK-LSK108) to prepare the DNA library, R9.5 chemistry,  
458 and Albacore v2.1.10 (<https://github.com/Albacore/albacore>) for basecalling.

## 459 **Assembly of genome and transcriptome data**

460 Using the Illumina short-read data, an initial assessment of genome ploidy based on  $k$ -  
461 mer distribution was conducted using GenomeScope2 [63]. The result indicates that the data  
462 likely represent a diploid genome ( $k = 21$ ; maximum 93.57% fit to the theoretical model). For  
463 genome assembly, we first combined all sequence data (Illumina short reads and Nanopore long  
464 reads) in a hybrid assembly using MaSuRCA v3.4.2 [64] at  $-ploidy\ 2$  using cabog in the final  
465 step of assembling corrected mega-reads.

466 Transcriptome data of *Ostreobium*, assembled using Trinity v2.9.1 [65] in the *de novo*  
467 mode, were obtained from an earlier published work [66]. Using the genome assembly  
468 generated in this study, the transcriptome (RNA-Seq) reads (GenBank BioProject accession  
469 PRJEB35267) were assembled using Trinity in the "genome-guided" mode. Both assembled

470 transcriptomes are used to guide identification of contaminant sequences and gene prediction  
471 (below).

## 472 **Identification and removal of contaminant sequences**

473 We implemented a comprehensive strategy to systematically identify contaminants using  
474 GC content, read coverage, taxonomic annotations, and transcriptome data (Figure S6).  
475 Blobtools v1.1.1 [67] was first employed to generate a taxon-annotated GC-coverage plot. For  
476 each scaffold, the "bestsum" taxrule was applied based on results of BLASTn search ( $E \leq 10^{-20}$ )  
477 against genome sequences from all Bacteria, Archaea, viruses, Rhodophyta, Chlorophyta,  
478 Glaucophyta, and Chytridiomycota within the GenBank nucleotide (nt) database. The "bestsum"  
479 taxrule sums up all hits to a particular taxonomic group across the scaffold, ultimately  
480 designating the scaffold as originating from the taxon with the greatest overall alignment (bit)  
481 score. Coverage information for Blobtools was generated based on mapping of Illumina short  
482 reads and Nanopore long reads using Bowtie2 v2.3.5.1 [68] and Minimap2 v2.17 [69],  
483 respectively. Trinity transcripts (both *de novo* and genome-guided) were mapped against the  
484 genome assembly using Minimap2 (-ax splice -C5 --splice-flank=no --secondary=no) to identify  
485 the number of mapped transcripts and intron-containing transcripts for each genome scaffold.

486 We integrated this information in our strategy for identifying putative contaminant  
487 sequences using a decision tree (Figure S6). Briefly, for scaffolds that were not designated as  
488 chlorophyte sequences, we assessed the genome scaffold individually based on a combination of  
489 other criteria (i.e., taxonomic designation, outliers of GC-content and/or read coverage, and  
490 mapping of transcripts and intron-containing transcripts). Following Blobtools [67], for GC  
491 content and read coverage independently, we define an outlier as a value outside of the range of  
492 median  $\pm$  interquartile range. For scaffolds that have no taxonomic designation, we do not  
493 exclude read-coverage outlier sequences if their GC is within the expected range, as these  
494 sequences likely represent repetitive regions of the genome. For scaffolds with a bacterial  
495 designation and mapped *Ostreobium* transcripts, we further require >10% of these transcripts to  
496 contain intron(s) to identify these scaffolds as non-contaminant. Full-length organellar genome

497 sequences were also recovered using known *O. quekettii* plastid (KY509314.1) and  
498 mitochondrial (NC\_045361.1) genomes as query in a BLASTn search and removed from the  
499 assembly. This process yielded the preliminary genome assembly (3134 scaffolds, N50 =  
500 71.03Kb, total assembly size 151.9Mb).

## 501 **Genome size estimation**

502 All the Illumina short reads from this study were mapped against the preliminary genome  
503 assembly with BWA v 0.7.17 [70] (mem mode; default parameters). Genome size was  
504 estimated based on *k*-mers of these reads that are free from putative contaminant sequences. The  
505 *k*-mers at *k* = 21 were enumerated using Jellyfish v2.3.0 [71], from which haploid genome size  
506 was estimated using Genomescope2.

## 507 **Generation of haploid genome assembly**

508 Because the data were estimated to be diploid, using the preliminary, contaminant-free genome  
509 assembly, a haploid representation of the assembly was generated using purge\_haplotigs [72] (-l  
510 10 -m 55 -h 160 -j 101). This resulted in the final haploid genome assembly (2857 scaffolds,  
511 N50 = 73.43KB, total assembly size 146.263 MB), plus an additional 5.64Mbp of predicted  
512 heterozygous genomic regions.

## 513 **Ab initio prediction of protein-coding genes**

514 We adapted the workflow from Chen et al. [73] for ab initio prediction of protein-coding  
515 genes in the haploid representation of *Ostreobium* genome assembly. This comprehensive  
516 workflow was initially designed for predicting genes from dinoflagellates, with modifications  
517 made to account for dinoflagellate-specific alternative splice sites; these modifications were  
518 ignored for predicting genes from *Ostreobium* because alternative intron splice sites are not  
519 expected in green algal genomes. Repetitive elements in the genome assembly were first  
520 predicted *de novo* using RepeatModeler v2.0.1 (<http://www.repeatmasker.org/RepeatModeler/>).

521 These repeats were combined with known repeats in the RepeatMasker database (release  
522 20181026) to generate a customised repeat library. All repetitive elements in the assembled  
523 genome scaffolds were then masked using RepeatMasker v4.1.0 (<http://www.repeatmasker.org/>)  
524 based on the customised repeat library, before they were subjected to prediction of genes.

525 The assembled transcripts were used as transcriptome evidence, and vector sequences  
526 were removed using SeqClean [74] based on UniVec (build 10) database. The PASA pipeline  
527 v2.4.1 [75] (`--MAX_INTRON_LENGTH 70000 --ALIGNERS blat`) and TransDecoder v5.5.0  
528 [65] were first used to predict protein-coding genes (and the associated protein sequences) from  
529 the vector-trimmed transcriptome assemblies (hereinafter transcript-based genes). The predicted  
530 protein sequences from multi-exon transcript-based genes with complete 5' and 3'-ends were  
531 searched (BLASTp,  $E \leq 10^{-20}$ ) against RefSeq proteins (release 98). Genes with significant  
532 BLASTp hits (>80% query coverage) were retained. Transposable elements were identified  
533 using HHblits v3.1.0 [76] and Transposon-PSI (<http://transposonpsi.sourceforge.net/>), searching  
534 against the transposon subset of UniRef30 database (release 2020\_03). Proteins putatively  
535 identified as transposable elements were removed. Those remaining were clustered using CD-  
536 HIT v4.8.1 (ID=75%) [77] to yield a non-redundant protein set, and the associated transcript-  
537 based genes were kept. These genes were further processed by the  
538 *Prepare\_golden\_genes\_for\_predictors.pl* script from the JAMg package  
539 (<https://github.com/genomecuration/JAMg>). This step yielded a set of high-quality “golden”  
540 genes, which were used as a training set for gene prediction using AUGUSTUS v3.3.3 [78]  
541 (`allow_dss_consensus_gc=true` and `non_gt_dss_prob=1` for intron model; `--softmasking=1 --`  
542 `gff3=on --UTR=on --exonnames=on`) and SNAP [79] (at default setting). We also employed  
543 GeneMark-ES v4.48 [80] at default settings to generate predictions from the genome scaffolds,  
544 and MAKER protein2genome v2.31.10 [81] (at default setting) to make predictions based on  
545 homology to SwissProt proteins (downloaded 2 March 2020). We used unmasked repeat data  
546 for PASA, hard-masked repeats for GeneMark-ES and soft-marked repeat data for all other  
547 programs.

548           Subsequently, all genes predicted using GeneMark-ES, MAKER, PASA, SNAP and  
549 AUGUSTUS were integrated into a combined set using EvidenceModeler v1.1.1 [82],  
550 following a weighting scheme of GeneMark-ES 2, MAKER 8, PASA 10, SNAP 2,  
551 AUGUSTUS 6. The resulting EvidenceModeler predictions were retained if they were  
552 constructed using evidence from PASA, or using two or more other prediction methods.

553           Functional information of translated predicted genes was retrieved using search BLASTP  
554 against UniProt databases (Swiss-Prot and TrEMBL), KEGG's annotation tool BlastKOALA  
555 [83]. Gene models of the genome dataset were annotated using InterProScan 5.39 [84] using  
556 InterPro (version 77.0 databases) of Pfam (32.0), SUPERFAMILY (1.75) and TIGRFAMs  
557 (15.0) [85]. The *Ostreobium* genomic data is available at  
558 <https://doi.org/10.5281/zenodo.4012771>.

## 559 **Orthogroups, phylogenetic analysis and BUSCO analysis**

560           For comparative genomic analyses, we built a dataset containing genomes and gene  
561 annotations of 20 green algae and two land plants (Data S1). We used the OrthoFinder 2.3.7  
562 [86] pipeline (default parameters) to cluster the potential orthologous protein families.  
563 Enrichment and depletion of domains in *Ostreobium* versus *Caulerpa lentillifera* were identified  
564 using Fisher's exact tests with a false discovery rate correction (Benjamini-Hochberg FDR  
565 method) of 0.05. All statistical tests were carried out in R [87]. Subcellular localisation of  
566 sequences of interest was performed using PSORT [88], using the WoLF PSORT web server  
567 (<https://wolfpsort.hgc.jp/>) with the 'plant' option, and PredAlgo [89], using default settings.

568           We performed phylogenetic analyses for protein families relevant for photobiology and  
569 oxidative stress response, based on the orthogroups obtained from the OrthoFinder analysis  
570 described above. The protein sequences were aligned using PROMALS3D, with default  
571 parameters [90]. All phylogenetic trees were inferred using IQ-TREE 1.6.12 with the built-in  
572 model selection function, and branch support estimated using ultrafast bootstrap with 1,000  
573 bootstrap replicates [91]. To identify the light-harvesting protein families associated with PSI

574 (Lhca), we also included Lhca protein sequences from *Bryopsis corticulans* [24] and  
575 *Chlamydomonas reinhardtii* [23].

576 We ran BUSCO v4.1.4 [92] on the *Ostreobium* genomic data using the Eukaryota dataset  
577 (eukaryota\_odb10.2020-09-10). This analysis identifies complete, duplicated, fragmented and  
578 missing genes that are expected to be present in a set of single-copy genes in the dataset. We ran  
579 identical BUSCO analyses on the *C. lentillifera*, *Ulva mutabilis* and *C. reinhardtii* genomes to  
580 allow direct comparison (Data S1).

## 581 **Metatranscriptome analysis of healthy and bleached corals**

### 582 *Experiment*

583 *Orbicella faveolata* fragments (4 cm<sup>2</sup>) from three different colonies were collected in  
584 Petempiche Puerto Morelos, Quintana Roo, Mexico (N 20° 54'17.0", W 86° 50'11.9") at a depth  
585 between eight and nine meters in June 2013 (Permit registration MX-HR-010-MEX, Folio 036).  
586 The coral skeleton and live tissue were collected using a hammer and chisel and were  
587 transported in seawater to perform the experiment at the Instituto de Ciencias del Mar y  
588 Limnología, UNAM. Three fragments were placed in each control and "experimental" tank at  
589 ~28°C. Following 18 days of acclimation, heaters were turned on in the treatment tank to reach  
590 ~32°C. After five days of severe heat exposure, bleached corals were moved back into the  
591 control tank to recover at 28°C, where they remained for 38 days (post-bleaching period). Post-  
592 bleached and controlled coral fragments were flash-frozen and preserved in liquid nitrogen.

### 593 *RNA library preparation and sequencing and data availability*

594 Coral fragments were ground to a fine powder in liquid nitrogen. Total RNA was  
595 extracted using the mirVana miRNA Isolation Kit (Life Technologies) since this kit resulted in  
596 higher coral holobiont RNA yield and quality. RNA was purified and concentrated using the  
597 RNA Clean and Concentrator kit (Zymo Research, Irvine, USA). RNA quantification was  
598 assessed on a Nanodrop and Qubit using 2.0 RNA Broad Range Assay Kit (Invitrogen). Quality

599 was verified using the Agilent Bioanalyzer 2100 (Agilent Technologies, Santa Clara, USA).  
600 Total RNA samples were sent for metatranscriptome sequencing to the US Department of  
601 Energy's Joint Genome Institute (JGI), California. Samples were depleted in ribosomal RNA  
602 and enriched in mRNA from whole holobionts employing a cocktail of RiboZero kits  
603 (Epicenter), including the human/mouse/rat kit, plant kit and the mixed populations of gram-  
604 negative and gram-positive bacteria kit. Following the RiboZero protocol, mRNA was  
605 converted to cDNA and amplified. The libraries were sequenced on the Illumina HiSeq 2000  
606 platform using 2 X 151 bp overlapping paired-end reads. Raw and filtered metatranscriptome  
607 sequence data, statistics and quality sequencing reports for the experiment are available at the  
608 US Department of Energy Joint Genome Institute (JGI)'s genome portal  
609 (<https://genome.jgi.doe.gov/portal/>) with accession codes 1086604, 1086606, 1086608,  
610 1086610, 1086612, 1086614, Community Sequencing Project No. 1622).

### 611 *Metatranscriptome analysis*

612 The raw reads were quality-trimmed to Q10, adapter-trimmed and filtered for process  
613 artifacts using BBDuk [93]. Ribosomal RNA reads were removed by mapping against a  
614 trimmed version of the Silva database using BBmap (<http://sourceforge.net/projects/bbmap>). To  
615 generate a de novo reference metatranscriptome, cleaned reads from all samples per species  
616 (replicates from control and treatment fragments) were pooled and assembled using Trinity  
617 version 2.1.1 [65].

618 We performed a BLASTn search to identify and separate the different members of the  
619 holobiont using a local database. This database was built with the *Ostreobium* genome, the sea  
620 anemones *Nematostella vectensis* [94] and *Exaiptasia diaphana* (syn. *Aiptasia pallida*) [95], the  
621 corals *Acropora digitifera* [20] and *Orbicella faveolata* [96], and the Symbiodiniaceae genomes  
622 *Breviolum minutum* [97], *Fugacium kawagutii* [1] and *Symbiodinium microadriaticum* [98], as  
623 well as several *Breviolum* spp. transcriptomes [99]. The resulting *Ostreobium* transcriptomic  
624 portion (varied from 0.04% to 0.11% among the biological replicates) was used as a reference  
625 for gene quantification and subsequent differential gene expression analyses.



626 Kallisto [100] was used to perform a pseudoalignment and quantify transcript  
627 abundances, using the *Ostreobium* contigs derived from the metatranscriptome assembly as a  
628 reference. A comparison of counts per million, a correlation matrix and principal component  
629 analysis among samples was performed for a quality check of the replicates per species. We  
630 used three different biological replicates (i.e. coral colonies), which were split into three control  
631 samples and three post-bleaching treated samples for differential expression analysis performed  
632 using the DESeq2 software [101]. Differential Expressed Genes (DEGs) were defined by using  
633 a cutoff threshold of False Discovery Rate FDR <0.001 and log fold change of 2. Enzyme  
634 Commission numbers (EC) were retrieved from the Kyoto Encyclopedia of Genes and Genomes  
635 (KEGG) database using MEGAN5 [102] for genes from each holobiont member (i.e. host,  
636 Symbiodiniaceae and *Ostreobium*).

### 637 *Taxonomic profile*

638 To obtain the taxonomic profile of the metatranscriptome, quality control of the raw reads  
639 and assembled contigs was performed using Trim Galore v0.5 [103]. The KMA aligner v.1.3.2  
640 [104] was used to map sequences against the NCBI nucleotide collection with the options '1t1 -  
641 mem\_mode -and -apm p -ef'. CCMetagen v.1.2.5 [105] was used for an additional quality  
642 control and to obtain ranked taxonomic information. CCMetagen\_merge was used with the  
643 options '-kr k -l Superkingdom -tlist Bacteria,Archaea' to obtain the taxonomic information of  
644 the prokaryotic community.

## 645 **Supplemental Figure titles**

646 **Figure S1. Maximum likelihood trees of light-harvesting complex proteins in green**  
647 **lineage. Related to Figure 2.**

648 (A) LHC associated with Photosystem I.

649 (B) LHC associated with Photosystem II.

650 Branch thickness shows the ultrafast bootstrap support results with 1000 replicates. *Ostreobium*  
651 proteins are in blue, *Caulerpa lentillifera* in teal, *Bryopsis corticulans* in purple,  
652 *Chlamydomonas reinhardtii* in orange and Streptophyta in green.

653

654 **Figure S2. Maximum likelihood tree of cryptochrome and photolyase photoreceptors.**

655 **Related to Photobiology in a dark place subsection.**

656 Branch support results from an ultrafast bootstrap with 1000 replicates. *Ostreobium* proteins are  
657 in blue, *Caulerpa lentillifera* in teal, *Chlamydomonas reinhardtii* in orange and Streptophyta in  
658 green.

659

660 **Figure S3. Maximum likelihood tree of protein families related to oxidative stress**

661 **response. Related to Figure 3.**

662 Branch thickness shows the support results from an ultrafast bootstrap with 1000 replicates.  
663 *Ostreobium* proteins are in blue, *Caulerpa lentillifera* in teal, *Chlamydomonas reinhardtii* in  
664 orange and *Ulva mutabilis* in purple. Superoxide dismutase, SOD; ascorbate peroxidase, APX;  
665 catalase, CAT; monodehydroascorbate reductase, MDHAR.

666

667 **Figure S4. The localisation of the reactions is based on data for *C. reinhardtii* []. Related**  
668 **to Life in an extreme environment section.**

669 Top and bottom organelles represent the mitochondrion and the chloroplast, respectively. The  
670 name of the genes encoding the relevant enzymes is shown in red and fermentation products are  
671 shown in purple boxes. Dashed lines represent transport across cellular compartments. The  
672 enzyme pyruvate decarboxylase (catalysing the production of acetaldehyde from pyruvate) was  
673 not found but the reaction is probably catalysed by another enzyme. We expect *Ostreobium* to  
674 use other electron acceptors to produce ATP and re-oxidize NAD(P)H and FADH<sub>2</sub>. *Ostreobium*  
675 possesses the enzymes required to produce succinate, lactate, formate, acetate, ethanol, alanine,  
676 and glycerol, but lacks H<sub>2</sub> and acetate production from acetyl-CoA (PAT1/PAT2 and  
677 ACK1/ACK2). Several fermentation-related genes are present in multiple copies (Data S1),

678 including two lactate dehydrogenases, four tandem copies of ALDH (aldehyde dehydrogenase),  
679 and six copies of malate dehydrogenase. The enzymes in the figure are: ADH1: alcohol  
680 dehydrogenase, ALAT: alanine aminotransferase, ALDH: aldehyde dehydrogenase, FDR:  
681 fumarate dehydrogenase, FUM: fumarase, GDP: glycerol-3-phosphate dehydrogenase,  
682 GPP: glycerol-3-phosphate phosphatase, LDH: lactate dehydrogenase, MDH: malate  
683 dehydrogenase, MME4: malic enzyme, PEPC: phosphoenolpyruvate carboxylase, PFL:  
684 pyruvate formate lyase, PPK: pyruvate, phosphate dikinase.

685

686 **Figure S5. Comparative analysis of enriched and depleted InterPro domains in**

687 ***Ostreobium* compared to the nonburrowing *Caulerpa lentillifera*. Related to Life in an**

688 **extreme environment section.**

689 Significant differences relative to *C. lentillifera* (Fisher's exact test, false discovery rate [FDR]-

690 corrected  $p < 0.05$ ). Z-scores represent the number of IPR hits normalized by the total number

691 of hits per species. Grey numbers denote the total count of genes with the respective IPR

692 domains in the genome selection.

693

694 **Figure S6. Systematical strategy to identify putative scaffolds from contaminants in the**

695 **assembled genome. Related to STAR Methods (Identification and removal of contaminant**

696 **sequences).**

697 **References**

- 698 1. Lin, S., Cheng, S., Song, B., Zhong, X., Lin, X., Li, W., Li, L., Zhang, Y., Zhang, H., Ji,  
699 Z., et al. (2015). The *Symbiodinium kawagutii* genome illuminates dinoflagellate gene  
700 expression and coral symbiosis. *Science* 350, 691-694.
- 701 2. Robbins, S.J., Singleton, C.M., Chan, C.X., Messer, L.F., Geers, A.U., Ying, H., Baker,  
702 A., Bell, S.C., Morrow, K.M., Ragan, M.A., et al. (2019). A genomic view of the reef-  
703 building coral *Porites lutea* and its microbial symbionts. *Nat Microbiol* 4, 2090-2100.
- 704 3. Marcelino, V.R., Morrow, K.M., van Oppen, M.J.H., Bourne, D.G., and Verbruggen, H.  
705 (2017). Diversity and stability of coral endolithic microbial communities at a naturally  
706 high pCO<sub>2</sub> reef. *Mol Ecol* 26, 5344-5357.
- 707 4. Ricci, F., Rossetto Marcelino, V., Blackall, L.L., Kuhl, M., Medina, M., and  
708 Verbruggen, H. (2019). Beneath the surface: community assembly and functions of the  
709 coral skeleton microbiome. *Microbiome* 7, 159.

- 710 5. Verbruggen, H., and Tribollet, A. (2011). Boring algae. *Curr Biol* 21, R876-877.
- 711 6. Tribollet, A. (2008). The boring microflora in modern coral reef ecosystems: a review  
712 of its roles. In *Current Developments in Bioerosion*. pp. 67-94.
- 713 7. Diaz-Pulido, G., and McCook, L.J. (2002). The fate of bleached corals: patterns and  
714 dynamics of algal recruitment. *Marine Ecology Progress Series* 232, 115-128.
- 715 8. Fine, M., Roff, G., Ainsworth, T.D., and Hoegh-Guldberg, O. (2006). Phototrophic  
716 microendoliths bloom during coral "white syndrome". *Coral Reefs* 25, 577-581.
- 717 9. Schlichter, D., Zscharnack, B., and Krisch, H. (1995). Transfer of photoassimilates from  
718 endolithic algae to coral tissue. *Naturwissenschaften* 82, 561-564.
- 719 10. Fine, M., and Loya, Y. (2002). Endolithic algae: an alternative source of  
720 photoassimilates during coral bleaching. *Proc Biol Sci* 269, 1205-1210.
- 721 11. Shashar, N., and Stambler, N. (1992). Endolithic algae within corals - life in an extreme  
722 environment. *J. Exp. Mar. Biol. Ecol.* 163, 277-286.
- 723 12. Magnusson, S.H., Fine, M., and Kuhl, M. (2007). Light microclimate of endolithic  
724 phototrophs in the scleractinian corals *Montipora monasteriata* and *Porites cylindrica*.  
725 *Marine Ecology Progress Series* 332, 119-128.
- 726 13. Koehne, B., Elli, G., Jennings, R.C., Wilhelm, C., and Trissl, H. (1999). Spectroscopic  
727 and molecular characterisation of a long wavelength absorbing antenna of *Ostreobium*  
728 sp. *Biochim Biophys Acta* 1412, 94-107.
- 729 14. Wilhelm, C., and Jakob, T. (2006). Uphill energy transfer from long-wavelength  
730 absorbing chlorophylls to PS II in *Ostreobium* sp. is functional in carbon assimilation.  
731 *Photosynth Res* 87, 323-329.
- 732 15. Kuhl, M., Holst, G., Larkum, A.W., and Ralph, P.J. (2008). Imaging of Oxygen  
733 Dynamics within the Endolithic Algal Community of the Massive Coral *Porites*  
734 *Lobata*(1). *J Phycol* 44, 541-550.
- 735 16. Leliaert, F., Smith, D.R., Moreau, H., Herron, M.D., Verbruggen, H., Delwiche, C.F.,  
736 and De Clerck, O. (2012). Phylogeny and Molecular Evolution of the Green Algae.  
737 *Critical Reviews in Plant Sciences* 31, 1-46.
- 738 17. Verbruggen, H., Ashworth, M., LoDuca, S.T., Vlaeminck, C., Cocquyt, E., Sauvage, T.,  
739 Zechman, F.W., Littler, D.S., Littler, M.M., Leliaert, F., et al. (2009). A multi-locus  
740 time-calibrated phylogeny of the siphonous green algae. *Mol Phylogenet Evol* 50, 642-  
741 653.
- 742 18. Tandon, K., Lu, C.Y., Chiang, P.W., Wada, N., Yang, S.H., Chan, Y.F., Chen, P.Y.,  
743 Chang, H.Y., Chiou, Y.J., Chou, M.S., et al. (2020). Comparative genomics: Dominant  
744 coral-bacterium *Endozoicomonas acroporae* metabolises dimethylsulfoniopropionate  
745 (DMSP). *ISME J* 14, 1290-1303.
- 746 19. Kwong, W.K., Del Campo, J., Mathur, V., Vermeij, M.J.A., and Keeling, P.J. (2019). A  
747 widespread coral-infecting apicomplexan with chlorophyll biosynthesis genes. *Nature*  
748 568, 103-107.
- 749 20. Shinzato, C., Shoguchi, E., Kawashima, T., Hamada, M., Hisata, K., Tanaka, M., Fujie,  
750 M., Fujiwara, M., Koyanagi, R., Ikuta, T., et al. (2011). Using the *Acropora digitifera*  
751 genome to understand coral responses to environmental change. *Nature* 476, 320-323.
- 752 21. Morosinotto, T., Breton, J., Bassi, R., and Croce, R. (2003). The nature of a chlorophyll  
753 ligand in Lhca proteins determines the far red fluorescence emission typical of  
754 photosystem I. *J Biol Chem* 278, 49223-49229.
- 755 22. Morosinotto, T., Castelletti, S., Breton, J., Bassi, R., and Croce, R. (2002). Mutation  
756 analysis of Lhca1 antenna complex. Low energy absorption forms originate from  
757 pigment-pigment interactions. *J Biol Chem* 277, 36253-36261.
- 758 23. Suga, M., Ozawa, S.I., Yoshida-Motomura, K., Akita, F., Miyazaki, N., and Takahashi,  
759 Y. (2019). Structure of the green algal photosystem I supercomplex with a decameric  
760 light-harvesting complex I. *Nat Plants* 5, 626-636.
- 761 24. Qin, X., Pi, X., Wang, W., Han, G., Zhu, L., Liu, M., Cheng, L., Shen, J.R., Kuang, T.,  
762 and Sui, S.F. (2019). Structure of a green algal photosystem I in complex with a large  
763 number of light-harvesting complex I subunits. *Nat Plants* 5, 263-272.

- 764 25. Six, C., Worden, A.Z., Rodriguez, F., Moreau, H., and Partensky, F. (2005). New  
765 insights into the nature and phylogeny of prasinophyte antenna proteins: *Ostreococcus*  
766 *tauri*, a case study. *Mol Biol Evol* 22, 2217-2230.
- 767 26. Koziol, A.G., Borza, T., Ishida, K., Keeling, P., Lee, R.W., and Durnford, D.G. (2007).  
768 Tracing the evolution of the light-harvesting antennae in chlorophyll a/b-containing  
769 organisms. *Plant Physiol* 143, 1802-1816.
- 770 27. Neilson, J.A., and Durnford, D.G. (2010). Structural and functional diversification of  
771 the light-harvesting complexes in photosynthetic eukaryotes. *Photosynth Res* 106, 57-  
772 71.
- 773 28. Christa, G., Cruz, S., Jahns, P., de Vries, J., Cartaxana, P., Esteves, A.C., Serodio, J.,  
774 and Gould, S.B. (2017). Photoprotection in a monophyletic branch of chlorophyte algae  
775 is independent of energy-dependent quenching (qE). *New Phytol* 214, 1132-1144.
- 776 29. Neilson, J.A., and Durnford, D.G. (2010). Evolutionary distribution of light-harvesting  
777 complex-like proteins in photosynthetic eukaryotes. *Genome* 53, 68-78.
- 778 30. Marcelino, V.R., Cremen, M.C., Jackson, C.J., Larkum, A.A., and Verbruggen, H.  
779 (2016). Evolutionary Dynamics of Chloroplast Genomes in Low Light: A Case Study of  
780 the Endolithic Green Alga *Ostreobium quekettii*. *Genome Biol Evol* 8, 2939-2951.
- 781 31. Rockwell, N.C., and Lagarias, J.C. (2020). Phytochrome evolution in 3D: deletion,  
782 duplication, and diversification. *New Phytol* 225, 2283-2300.
- 783 32. Duanmu, D., Bachy, C., Sudek, S., Wong, C.H., Jimenez, V., Rockwell, N.C., Martin,  
784 S.S., Ngan, C.Y., Reistetter, E.N., van Baren, M.J., et al. (2014). Marine algae and land  
785 plants share conserved phytochrome signaling systems. *Proc Natl Acad Sci U S A* 111,  
786 15827-15832.
- 787 33. Kottke, T., Oldemeyer, S., Wenzel, S., Zou, Y., and Mittag, M. (2017). Cryptochrome  
788 photoreceptors in green algae: Unexpected versatility of mechanisms and functions. *J*  
789 *Plant Physiol* 217, 4-14.
- 790 34. Beel, B., Prager, K., Spexard, M., Sasso, S., Weiss, D., Muller, N., Heinnickel, M.,  
791 Dewez, D., Ikoma, D., Grossman, A.R., et al. (2012). A flavin binding cryptochrome  
792 photoreceptor responds to both blue and red light in *Chlamydomonas reinhardtii*. *Plant*  
793 *Cell* 24, 2992-3008.
- 794 35. Duanmu, D., Rockwell, N.C., and Lagarias, J.C. (2017). Algal light sensing and  
795 photoacclimation in aquatic environments. *Plant Cell Environ* 40, 2558-2570.
- 796 36. Ogura, Y., Tokutomi, S., Wada, M., and Kiyosue, T. (2008). PAS/LOV proteins: A  
797 proposed new class of plant blue light receptor. *Plant Signal Behav* 3, 966-968.
- 798 37. Suzuki, J.Y., and Bauer, C.E. (1995). A prokaryotic origin for light-dependent  
799 chlorophyll biosynthesis of plants. *Proc Natl Acad Sci U S A* 92, 3749-3753.
- 800 38. Hunsperger, H.M., Randhawa, T., and Cattolico, R.A. (2015). Extensive horizontal  
801 gene transfer, duplication, and loss of chlorophyll synthesis genes in the algae. *BMC*  
802 *Evol Biol* 15, 16.
- 803 39. Cremen, M.C.M., Leliaert, F., Marcelino, V.R., and Verbruggen, H. (2018). Large  
804 Diversity of Nonstandard Genes and Dynamic Evolution of Chloroplast Genomes in  
805 Siphonous Green Algae (Bryopsidales, Chlorophyta). *Genome Biol Evol* 10, 1048-  
806 1061.
- 807 40. Yamazaki, S., Nomata, J., and Fujita, Y. (2006). Differential operation of dual  
808 protochlorophyllide reductases for chlorophyll biosynthesis in response to  
809 environmental oxygen levels in the cyanobacterium *Leptolyngbya boryana*. *Plant*  
810 *Physiol* 142, 911-922.
- 811 41. Gálová, E., Šalgovičová, I., Demko, V., Mikulová, K., Ševčovičová, A., Slovák, L.,  
812 Kyselá, V., and Hudák, J. (2008). A short overview of chlorophyll biosynthesis in  
813 algae. *Biologia* 63.
- 814 42. Verbruggen, H., Marcelino, V.R., Guiry, M.D., Cremen, M.C.M., and Jackson, C.J.  
815 (2017). Phylogenetic position of the coral symbiont *Ostreobium* (Ulvophyceae) inferred  
816 from chloroplast genome data. *J Phycol* 53, 790-803.

- 817 43. Marcelino, V.R., and Verbruggen, H. (2016). Multi-marker metabarcoding of coral  
818 skeletons reveals a rich microbiome and diverse evolutionary origins of endolithic  
819 algae. *Sci Rep* 6, 31508.
- 820 44. Del Cortona, A., Jackson, C.J., Bucchini, F., Van Bel, M., D'Hondt, S., Skaloud, P.,  
821 Delwiche, C.F., Knoll, A.H., Raven, J.A., Verbruggen, H., et al. (2020). Neoproterozoic  
822 origin and multiple transitions to macroscopic growth in green seaweeds. *Proc Natl*  
823 *Acad Sci U S A* 117, 2551-2559.
- 824 45. Dullo, W.-C., Gektidis, M., Golubic, S., Heiss, G.A., Kampmann, H., Kiene, W., Kroll,  
825 D.K., Kuhrau, M.L., Radtke, G., Reijmer, J.G., et al. (1995). Factors controlling  
826 holocene reef growth: An interdisciplinary approach. *Facies* 32, 145-188.
- 827 46. Grossman, A.R., Bhaya, D., Apt, K.E., and Kehoe, D.M. (1995). Light-harvesting  
828 complexes in oxygenic photosynthesis: Diversity, Control, and Evolution. *Annu Rev*  
829 *Genet* 29, 231-288.
- 830 47. Foyer, C.H. (2018). Reactive oxygen species, oxidative signaling and the regulation of  
831 photosynthesis. *Environ Exp Bot* 154, 134-142.
- 832 48. Mallick, N., and Mohn, F.H. (2000). Reactive oxygen species: response of algal cells.  
833 *Journal of Plant Physiology* 157, 183-193.
- 834 49. Mao Che, L., Le Campion-Alsumard, T., Boury-Esnault, N., Payri, C., Golubic, S., and  
835 Bézac, C. (1996). Biodegradation of shells of the black pearl oyster, *Pinctada*  
836 *margaritifera* var. *cumingii*, by microborers and sponges of French Polynesia. *Marine*  
837 *Biology* 126, 509-519.
- 838 50. Bentis, C.J., Kaufman, L., and Golubic, S. (2000). Endolithic fungi in reef-building  
839 corals (Order : Scleractinia) are common, cosmopolitan, and potentially pathogenic.  
840 *Biol Bull* 198, 254-260.
- 841 51. Tribollet, A., Chauvin, A., and Cuet, P. (2019). Carbonate dissolution by reef microbial  
842 borers: a biogeological process producing alkalinity under different pCO<sub>2</sub> conditions.  
843 *Facies* 65.
- 844 52. Garcia-Pichel, F., Ramirez-Reinat, E., and Gao, Q. (2010). Microbial excavation of  
845 solid carbonates powered by P-type ATPase-mediated transcellular Ca<sup>2+</sup> transport.  
846 *Proc Natl Acad Sci U S A* 107, 21749-21754.
- 847 53. Machingura, M.C., Bajsa-Hirschel, J., Laborde, S.M., Schwartzenburg, J.B., Mukherjee,  
848 B., Mukherjee, A., Pollock, S.V., Forster, B., Price, G.D., and Moroney, J.V. (2017).  
849 Identification and characterisation of a solute carrier, CIA8, involved in inorganic  
850 carbon acclimation in *Chlamydomonas reinhardtii*. *J Exp Bot* 68, 3879-3890.
- 851 54. Matthews, J.L., Raina, J.B., Kahlke, T., Seymour, J.R., van Oppen, M.J.H., and Suggett,  
852 D.J. (2020). Symbiodiniaceae-bacteria interactions: rethinking metabolite exchange in  
853 reef-building corals as multi-partner metabolic networks. *Environ Microbiol*.
- 854 55. Croft, M.T., Lawrence, A.D., Raux-Deery, E., Warren, M.J., and Smith, A.G. (2005).  
855 Algae acquire vitamin B12 through a symbiotic relationship with bacteria. *Nature* 438,  
856 90-93.
- 857 56. Helliwell, K.E., Wheeler, G.L., Leptos, K.C., Goldstein, R.E., and Smith, A.G. (2011).  
858 Insights into the evolution of vitamin B12 auxotrophy from sequenced algal genomes.  
859 *Mol Biol Evol* 28, 2921-2933.
- 860 57. Burriesci, M.S., Raab, T.K., and Pringle, J.R. (2012). Evidence that glucose is the major  
861 transferred metabolite in dinoflagellate-cnidarian symbiosis. *J Exp Biol* 215, 3467-  
862 3477.
- 863 58. Radecker, N., Pogoreutz, C., Voolstra, C.R., Wiedenmann, J., and Wild, C. (2015).  
864 Nitrogen cycling in corals: the key to understanding holobiont functioning? *Trends*  
865 *Microbiol* 23, 490-497.
- 866 59. Ferrer, L.M., and Szmant, A.M. (1988). Nutrient regeneration by the endolithic  
867 community in coral skeletons. *Proc. 6th Coral Reef Symp.* 3, 1-4.
- 868 60. Del Campo, J., Pombert, J.F., Slapeta, J., Larkum, A., and Keeling, P.J. (2017). The  
869 'other' coral symbiont: *Ostreobium* diversity and distribution. *ISME J* 11, 296-299.
- 870 61. Gutner-Hoch, E., and Fine, M. (2011). Genotypic diversity and distribution of  
871 *Ostreobium quekettii* within scleractinian corals. *Coral Reefs* 30, 643-650.

- 872 62. Cremen, M.C.M., Huisman, J.M., Marcelino, V.R., and Verbruggen, H. (2016).  
873 Taxonomic revision of Halimeda (Bryopsidales, Chlorophyta) in south-western  
874 Australia. *Australian Systematic Botany* 29.
- 875 63. Ranallo-Benavidez, T.R., Jaron, K.S., and Schatz, M.C. (2020). GenomeScope 2.0 and  
876 Smudgeplot for reference-free profiling of polyploid genomes. *Nat Commun* 11, 1432.
- 877 64. Zimin, A.V., Puiu, D., Luo, M.C., Zhu, T., Koren, S., Marcais, G., Yorke, J.A., Dvorak,  
878 J., and Salzberg, S.L. (2017). Hybrid assembly of the large and highly repetitive  
879 genome of *Aegilops tauschii*, a progenitor of bread wheat, with the MaSuRCA mega-  
880 reads algorithm. *Genome Res* 27, 787-792.
- 881 65. Haas, B.J., Papanicolaou, A., Yassour, M., Grabherr, M., Blood, P.D., Bowden, J.,  
882 Couger, M.B., Eccles, D., Li, B., Lieber, M., et al. (2013). De novo transcript sequence  
883 reconstruction from RNA-seq using the Trinity platform for reference generation and  
884 analysis. *Nat Protoc* 8, 1494-1512.
- 885 66. Repetti, S.I., Jackson, C.J., Judd, L.M., Wick, R.R., Holt, K.E., and Verbruggen, H.  
886 (2020). The inflated mitochondrial genomes of siphonous green algae reflect processes  
887 driving expansion of noncoding DNA and proliferation of introns. *PeerJ* 8, e8273.
- 888 67. Laetsch, D.R., and Blaxter, M.L. (2017). BlobTools: Interrogation of genome  
889 assemblies. *F1000Research* 6.
- 890 68. Langmead, B., and Salzberg, S.L. (2012). Fast gapped-read alignment with Bowtie 2.  
891 *Nat Methods* 9, 357-359.
- 892 69. Li, H. (2018). Minimap2: pairwise alignment for nucleotide sequences. *Bioinformatics*  
893 34, 3094-3100.
- 894 70. Li, H., and Durbin, R. (2009). Fast and accurate short read alignment with Burrows-  
895 Wheeler transform. *Bioinformatics* 25, 1754-1760.
- 896 71. Marcais, G., and Kingsford, C. (2011). A fast, lock-free approach for efficient parallel  
897 counting of occurrences of k-mers. *Bioinformatics* 27, 764-770.
- 898 72. Roach, M.J., Schmidt, S.A., and Borneman, A.R. (2018). Purge Haplotigs: allelic contig  
899 reassignment for third-gen diploid genome assemblies. *BMC Bioinformatics* 19, 460.
- 900 73. Chen, Y., Gonzalez-Pech, R.A., Stephens, T.G., Bhattacharya, D., and Chan, C.X.  
901 (2020). Evidence That Inconsistent Gene Prediction Can Mislead Analysis of  
902 Dinoflagellate Genomes. *J Phycol* 56, 6-10.
- 903 74. Chen, Y.A., Lin, C.C., Wang, C.D., Wu, H.B., and Hwang, P.I. (2007). An optimised  
904 procedure greatly improves EST vector contamination removal. *BMC Genomics* 8, 416.
- 905 75. Haas, B.J., Delcher, A.L., Mount, S.M., Wortman, J.R., Smith, R.K., Jr., Hannick, L.I.,  
906 Maiti, R., Ronning, C.M., Rusch, D.B., Town, C.D., et al. (2003). Improving the  
907 *Arabidopsis* genome annotation using maximal transcript alignment assemblies. *Nucleic*  
908 *Acids Res* 31, 5654-5666.
- 909 76. Remmert, M., Biegert, A., Hauser, A., and Soding, J. (2011). HHblits: lightning-fast  
910 iterative protein sequence searching by HMM-HMM alignment. *Nat Methods* 9, 173-  
911 175.
- 912 77. Li, W., and Godzik, A. (2006). Cd-hit: a fast program for clustering and comparing  
913 large sets of protein or nucleotide sequences. *Bioinformatics* 22, 1658-1659.
- 914 78. Stanke, M., Keller, O., Gunduz, I., Hayes, A., Waack, S., and Morgenstern, B. (2006).  
915 AUGUSTUS: ab initio prediction of alternative transcripts. *Nucleic Acids Res* 34,  
916 W435-439.
- 917 79. Korf, I. (2004). Gene finding in novel genomes. *BMC Bioinformatics* 5, 59.
- 918 80. Lomsadze, A., Gemayel, K., Tang, S., and Borodovsky, M. (2018). Modeling leaderless  
919 transcription and atypical genes results in more accurate gene prediction in prokaryotes.  
920 *Genome Res* 28, 1079-1089.
- 921 81. Holt, C., and Yandell, M. (2011). MAKER2: an annotation pipeline and genome-  
922 database management tool for second-generation genome projects. *BMC*  
923 *Bioinformatics* 12, 491.
- 924 82. Haas, B.J., Salzberg, S.L., Zhu, W., Pertea, M., Allen, J.E., Orvis, J., White, O., Buell,  
925 C.R., and Wortman, J.R. (2008). Automated eukaryotic gene structure annotation using

- 926 EVIDENCEModeler and the Program to Assemble Spliced Alignments. *Genome Biol* 9,  
927 R7.
- 928 83. Kanehisa, M., Sato, Y., and Morishima, K. (2016). BlastKOALA and GhostKOALA:  
929 KEGG Tools for Functional Characterisation of Genome and Metagenome Sequences. *J*  
930 *Mol Biol* 428, 726-731.
- 931 84. Jones, P., Binns, D., Chang, H.Y., Fraser, M., Li, W., McAnulla, C., McWilliam, H.,  
932 Maslen, J., Mitchell, A., Nuka, G., et al. (2014). InterProScan 5: genome-scale protein  
933 function classification. *Bioinformatics* 30, 1236-1240.
- 934 85. Mitchell, A.L., Attwood, T.K., Babbitt, P.C., Blum, M., Bork, P., Bridge, A., Brown,  
935 S.D., Chang, H.Y., El-Gebali, S., Fraser, M.I., et al. (2019). InterPro in 2019: improving  
936 coverage, classification and access to protein sequence annotations. *Nucleic Acids Res*  
937 47, D351-D360.
- 938 86. Emms, D.M., and Kelly, S. (2019). OrthoFinder: phylogenetic orthology inference for  
939 comparative genomics. *Genome Biol* 20, 238.
- 940 87. Team, R.D.C. (2018). R: A Language and Environment for Statistical Computing.  
941 (Vienna, Austria: R Foundation for Statistical Computing).
- 942 88. Horton, P., Park, K.J., Obayashi, T., Fujita, N., Harada, H., Adams-Collier, C.J., and  
943 Nakai, K. (2007). WoLF PSORT: protein localisation predictor. *Nucleic Acids Res* 35,  
944 W585-587.
- 945 89. Tardif, M., Atteia, A., Specht, M., Cogne, G., Rolland, N., Brugiere, S., Hippler, M.,  
946 Ferro, M., Bruley, C., Peltier, G., et al. (2012). PredAlgo: a new subcellular localisation  
947 prediction tool dedicated to green algae. *Mol Biol Evol* 29, 3625-3639.
- 948 90. Pei, J., Kim, B.H., and Grishin, N.V. (2008). PROMALS3D: a tool for multiple protein  
949 sequence and structure alignments. *Nucleic Acids Res* 36, 2295-2300.
- 950 91. Nguyen, L.T., Schmidt, H.A., von Haeseler, A., and Minh, B.Q. (2015). IQ-TREE: a  
951 fast and effective stochastic algorithm for estimating maximum-likelihood phylogenies.  
952 *Mol Biol Evol* 32, 268-274.
- 953 92. Waterhouse, R.M., Seppey, M., Simao, F.A., Manni, M., Ioannidis, P., Klioutchnikov,  
954 G., Kriventseva, E.V., and Zdobnov, E.M. (2018). BUSCO Applications from Quality  
955 Assessments to Gene Prediction and Phylogenomics. *Mol Biol Evol* 35, 543-548.
- 956 93. Bushnell, B. (2019). Bbtools Software Package. Volume 2019.
- 957 94. Putnam, N.H., Srivastava, M., Hellsten, U., Dirks, B., Chapman, J., Salamov, A., Terry,  
958 A., Shapiro, H., Lindquist, E., Kapitonov, V.V., et al. (2007). Sea anemone genome  
959 reveals ancestral eumetazoan gene repertoire and genomic organisation. *Science* 317,  
960 86-94.
- 961 95. Baumgarten, S., Simakov, O., Esherrick, L.Y., Liew, Y.J., Lehnert, E.M., Michell, C.T.,  
962 Li, Y., Hambleton, E.A., Guse, A., Oates, M.E., et al. (2015). The genome of *Aiptasia*, a  
963 sea anemone model for coral symbiosis. *Proc Natl Acad Sci U S A* 112, 11893-11898.
- 964 96. Prada, C., Hanna, B., Budd, A.F., Woodley, C.M., Schmutz, J., Grimwood, J., Iglesias-  
965 Prieto, R., Pandolfi, J.M., Levitan, D., Johnson, K.G., et al. (2016). Empty Niches after  
966 Extinctions Increase Population Sizes of Modern Corals. *Curr Biol* 26, 3190-3194.
- 967 97. Shoguchi, E., Shinzato, C., Kawashima, T., Gyoja, F., Mungpakdee, S., Koyanagi, R.,  
968 Takeuchi, T., Hisata, K., Tanaka, M., Fujiwara, M., et al. (2013). Draft assembly of the  
969 *Symbiodinium minutum* nuclear genome reveals dinoflagellate gene structure. *Curr*  
970 *Biol* 23, 1399-1408.
- 971 98. Aranda, M., Li, Y., Liew, Y.J., Baumgarten, S., Simakov, O., Wilson, M.C., Piel, J.,  
972 Ashoor, H., Bougouffa, S., Bajic, V.B., et al. (2016). Genomes of coral dinoflagellate  
973 symbionts highlight evolutionary adaptations conducive to a symbiotic lifestyle. *Sci*  
974 *Rep* 6, 39734.
- 975 99. Parkinson, J.E., Baumgarten, S., Michell, C.T., Baums, I.B., LaJeunesse, T.C., and  
976 Voolstra, C.R. (2016). Gene Expression Variation Resolves Species and Individual  
977 Strains among Coral-Associated Dinoflagellates within the Genus *Symbiodinium*.  
978 *Genome Biol Evol* 8, 665-680.
- 979 100. Bray, N.L., Pimentel, H., Melsted, P., and Pachter, L. (2016). Near-optimal probabilistic  
980 RNA-seq quantification. *Nature Biotechnology* 34, 525-527.



- 981 101. Love, M.I., Huber, W., and Anders, S. (2014). Moderated estimation of fold change and  
982 dispersion for RNA-seq data with DESeq2. *Genome Biol* *15*, 550.
- 983 102. Huson, D.H., Beier, S., Flade, I., Gorska, A., El-Hadidi, M., Mitra, S., Ruscheweyh,  
984 H.J., and Tappu, R. (2016). MEGAN Community Edition - Interactive Exploration and  
985 Analysis of Large-Scale Microbiome Sequencing Data. *PLoS Comput Biol* *12*,  
986 e1004957.
- 987 103. Krueger, F. (2015). Trim Galore: A wrapper tool around Cutadapt and FastQC to  
988 consistently apply quality and adapter trimming to FastQ files, with some extra  
989 functionality for MspI-digested RRBS-type (Reduced Representation Bisulfite-Seq)  
990 libraries. ([http://www.bioinformatics.babraham.ac.uk/projects/trim\\_galore/](http://www.bioinformatics.babraham.ac.uk/projects/trim_galore/)).
- 991 104. Clausen, P., Aarestrup, F.M., and Lund, O. (2018). Rapid and precise alignment of raw  
992 reads against redundant databases with KMA. *BMC Bioinformatics* *19*, 307.
- 993 105. Marcelino, V.R., Clausen, P., Buchmann, J.P., Wille, M., Iredell, J.R., Meyer, W.,  
994 Lund, O., Sorrell, T.C., and Holmes, E.C. (2020). CCMetagen: comprehensive and  
995 accurate identification of eukaryotes and prokaryotes in metagenomic data. *Genome*  
996 *Biol* *21*, 103.
- 997 106. Catalanotti, C., Yang, W., Posewitz, M.C., and Grossman, A.R. (2013). Fermentation  
998 metabolism and its evolution in algae. *Front Plant Sci* *4*, 150.

A

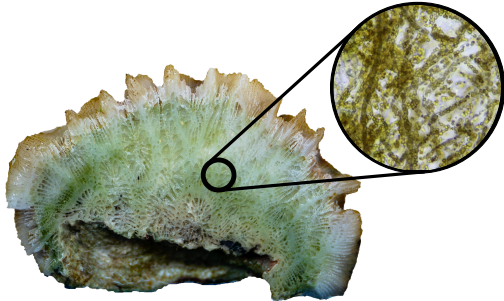

B

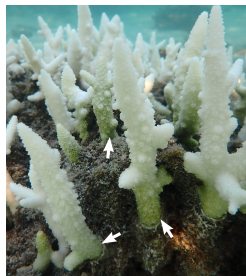

C

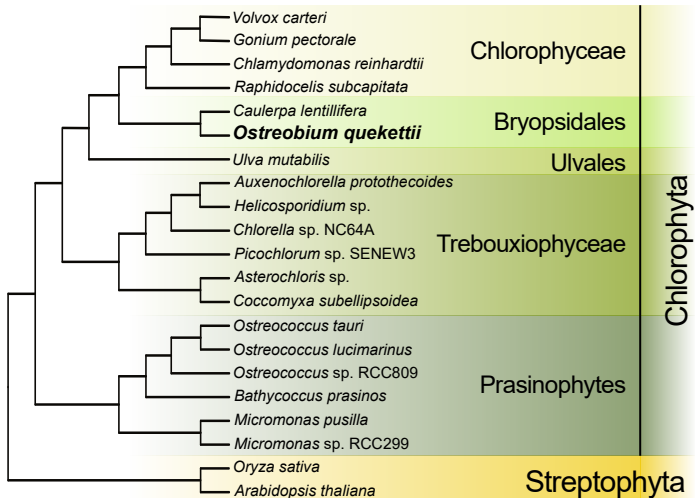

A

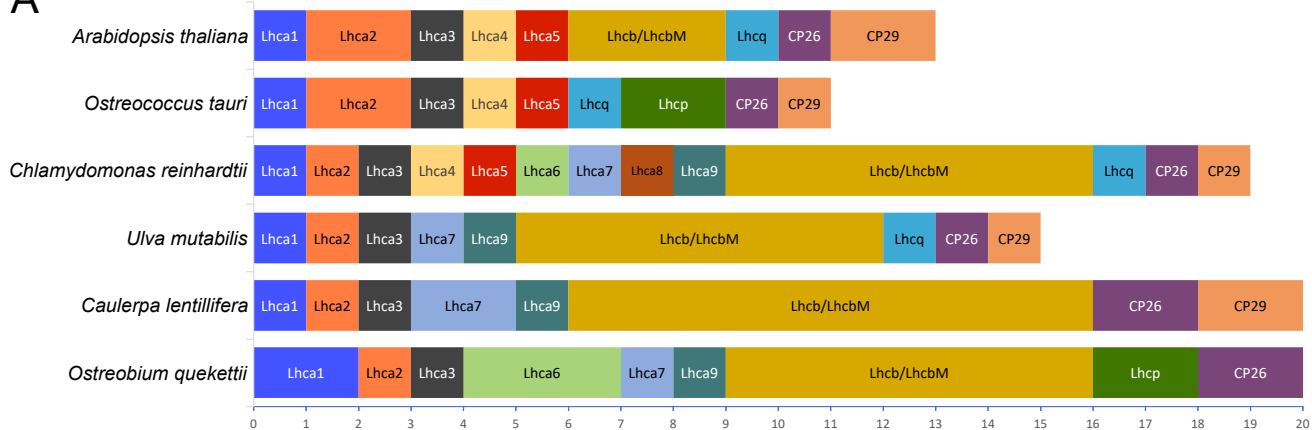

B

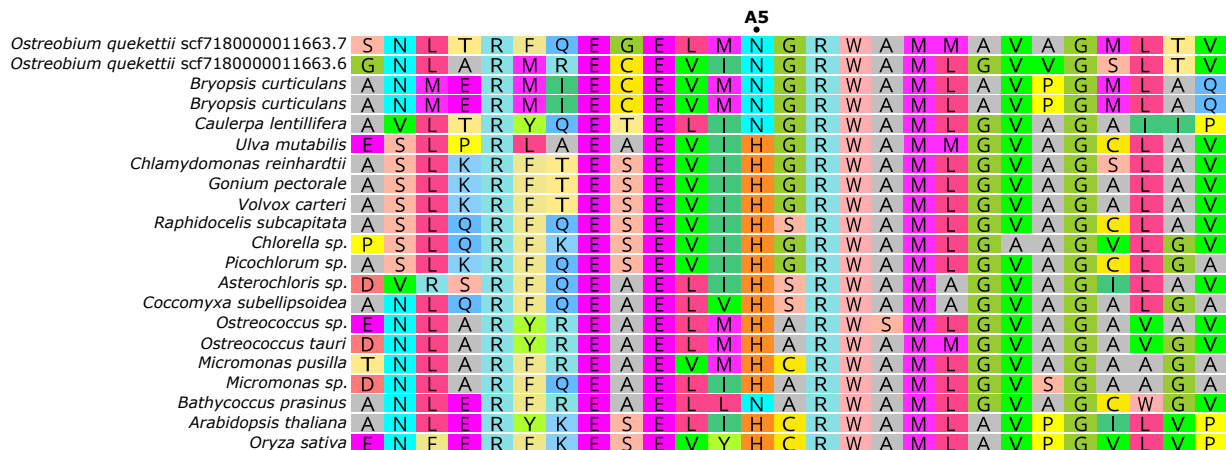

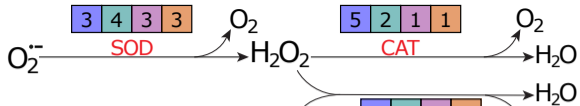

Glutathione disulphite
 
 Ascorbate
 

|   |   |   |   |
|---|---|---|---|
| 5 | 2 | 5 | 3 |
|---|---|---|---|

APX

Monodehydroascorbate

$NAD^+$

|   |   |   |   |
|---|---|---|---|
| 1 | 2 | 2 | 2 |
|---|---|---|---|

GR

|   |   |   |   |
|---|---|---|---|
| 4 | 3 | 6 | 2 |
|---|---|---|---|

DHAR

|   |   |   |   |
|---|---|---|---|
| 4 | 1 | 0 | 1 |
|---|---|---|---|

MDHAR

$NAD^+$

$NADH$

Dehydroascorbate

Glutathione

*Ostreobium quekettii*

*Caulerpa lentillifera*

*Ulva mutabilis*

*Chlamydomonas reinhardtii*

## A. carbonate dissolution

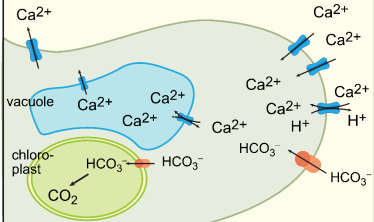

## B. metabolic interactions

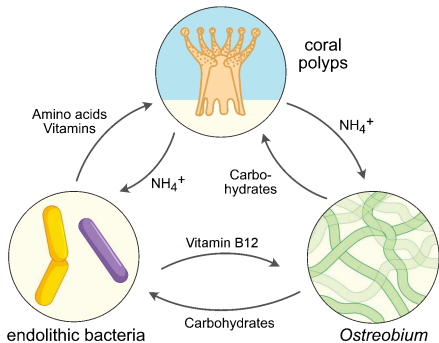

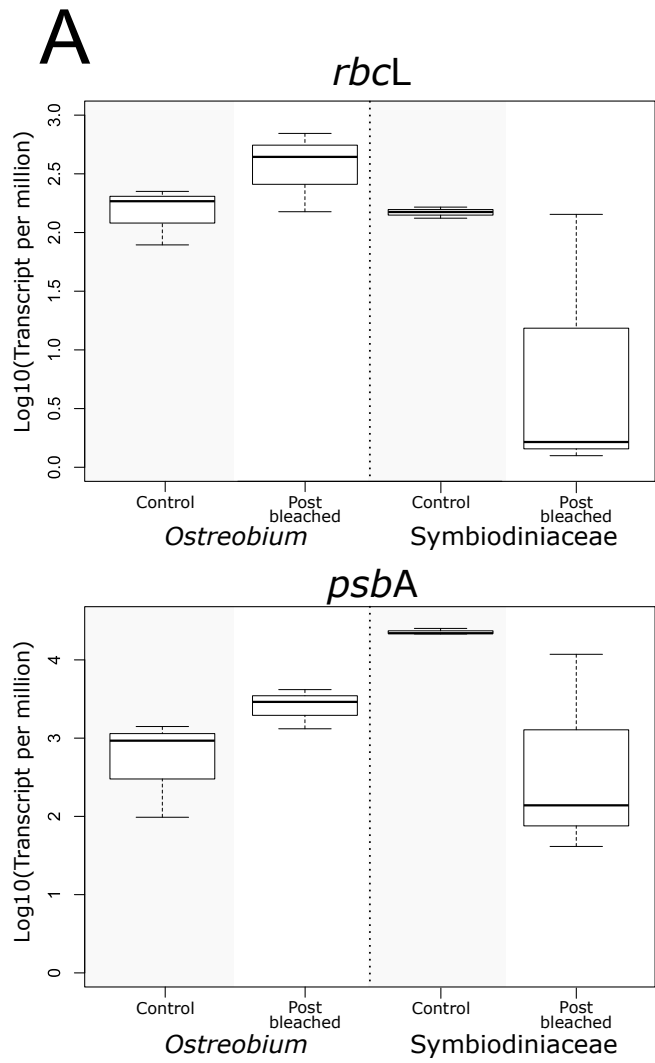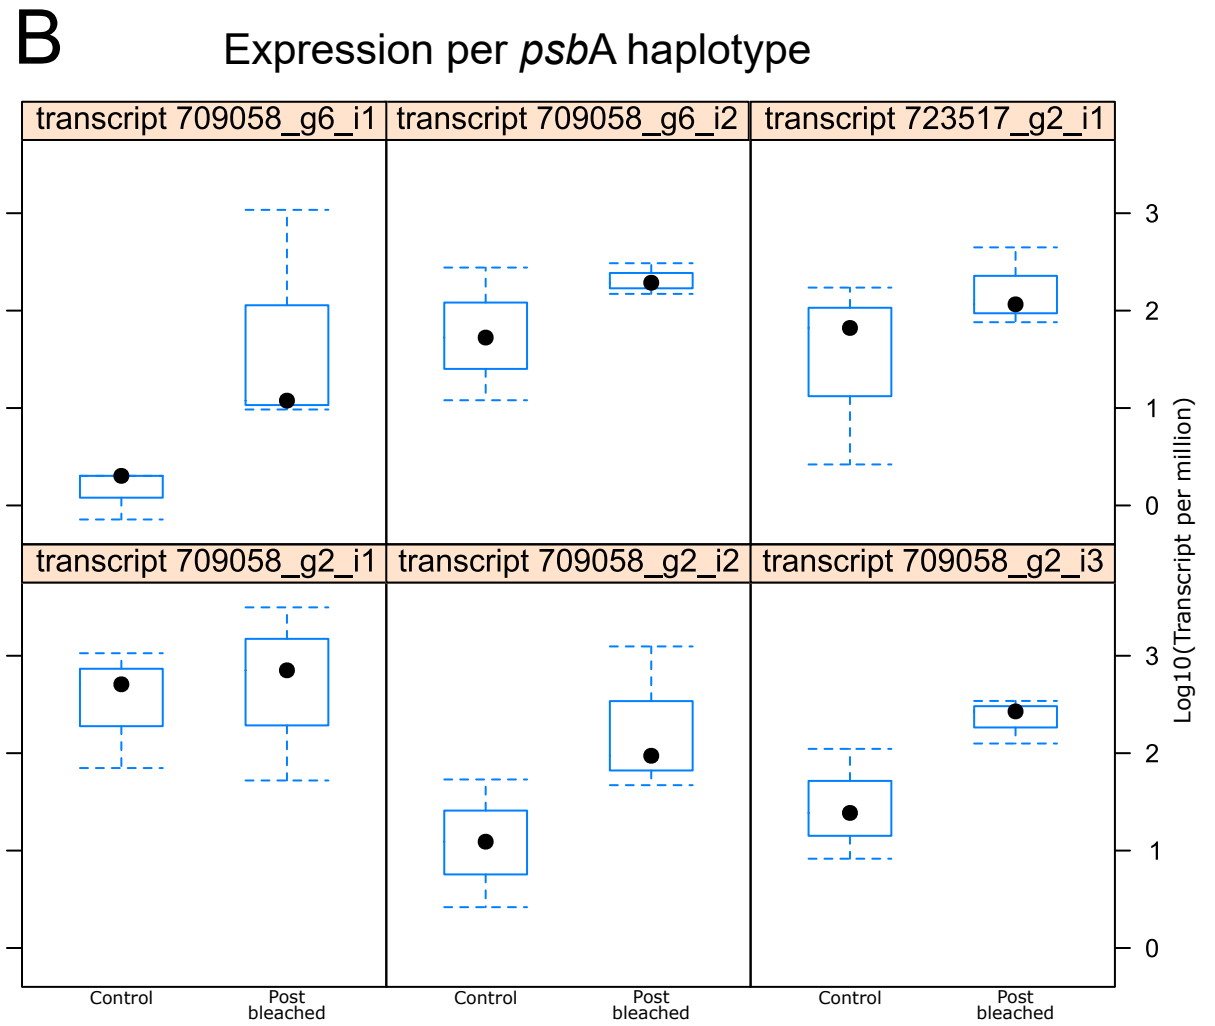

Source: https://www.biorxiv.org/content/10.1101/2020.07.21.211367v2.full.pdf
